# Supplementary material for: Electrochemical deposition as a unique solution processing method for insoluble organic optoelectronic materials
Source: Royal Society of Chemistry journal article supplement (doi:10.1039/c4tc01134a), 2014-01-01
Supplement: c4tc01134a1.pdf [file c4tc01134a1.pdf]

## Electrochemical deposition as a unique solution processing method for insoluble organic optoelectronic materials

Emily Allwright, Dominik M. Berg, Rabie Djemour, Marc Steichen, Phillip J. Dale and Neil Robertson\*

### Supplementary Information

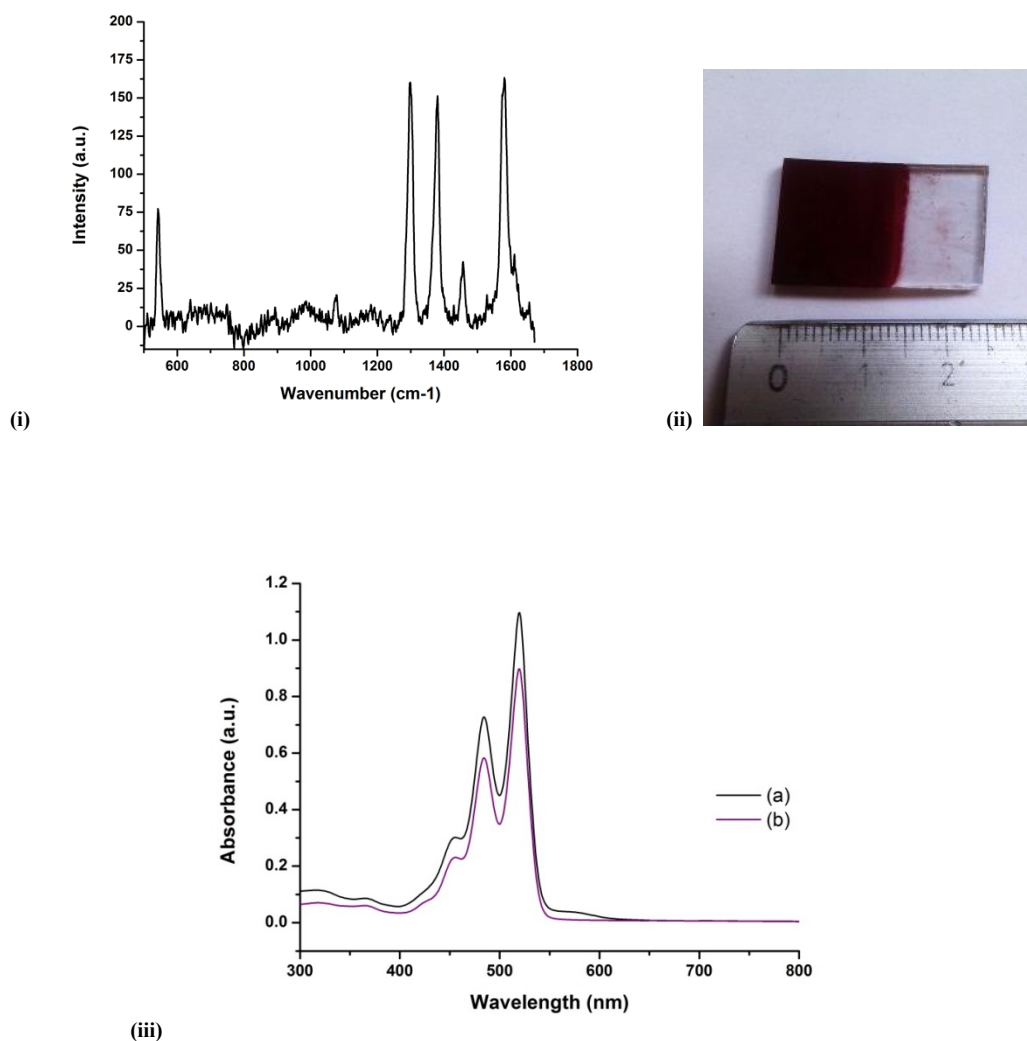

Fig. S1 (i) Raman scattering spectrum of the BuPTCDI film. (ii) Photograph of a BuPTCDI film deposited at 0.30V for 1800s (iii) UV/Vis spectra of (a) BuPTCDI dissolved in THF and (b) Recovered electrodeposited BuPTCDI film in THF

**Table S1:** Observed Raman wavenumbers of thin film of BuPTCDI

| Peaks (cm <sup>-1</sup> ) | Assignments             |
|---------------------------|-------------------------|
| 542                       | Perylene deformation    |
| 1076                      | C-H bend                |
| 1298                      | C-H bend + ring stretch |
| 1381                      | Perylene ring stretch   |
| 1458                      | Perylene ring stretch   |
| 1581                      | C=C stretch             |

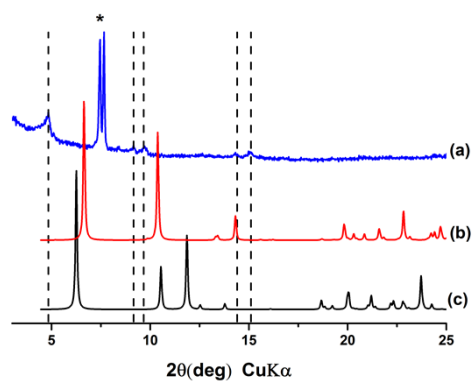

**Fig. S2** Different XRD patterns of BuPTCDI (a) Electrodeposited film; and projected spectra from the single crystal data from (b) J. Mizuguchi, *Z. Kristallogr. NCS*, 2003, pp. 131-133 and (c) E. Hadicke and F. Graser, *Acta Crystallographica Section C*, 1986, 42, 189-195

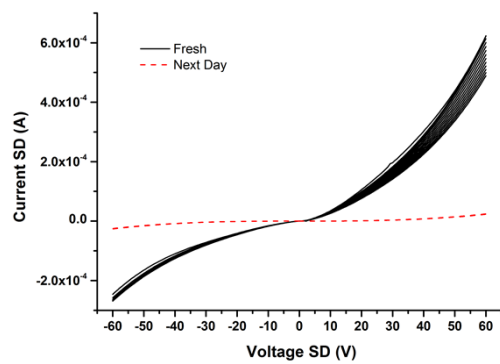

**Fig. S3** Drain current  $I_d$  vs. source-drain voltage  $V_d$  curves for various source-gate voltages for BuPTCDI field effect transistors of a fresh film and the same film the next day.
